# Supplementary material
Source: Royal Society of Chemistry journal article supplement (doi:10.1039/d6ay00543h)
Supplement: d6ay00543h1.pdf [file d6ay00543h1.pdf]

1

## Supplementary information

### 2 **A Zwitterionic-Enabled One-Pot Electrochemical Strategy for Stable** 3 **End-Point Detection of Isothermal Nucleic Acid Amplification**

4 Yijie Wang<sup>a, 1</sup>, Yang Li<sup>a, 1</sup>, Jiufa Zhang<sup>a</sup>, Mingjun Cai<sup>a</sup>, Qi Fu<sup>a</sup>, Xiaohan Lin<sup>a</sup>, Cuiping  
5 Ma<sup>b</sup>, Chao Shi<sup>a, c\*</sup>

6 <sup>a</sup> *Qingdao Nucleic Acid Rapid Testing International Science and Technology*  
7 *Cooperation Base, College of Life Sciences, Qingdao University, Qingdao, 266071, P.*

8

9 *R. China.*

10 <sup>b</sup> *Sino-UAE International Cooperative Joint Laboratory of Pathogenic*  
11 *Microorganism Rapid Detection, Qingdao Nucleic Acid Rapid Detection Engineering*  
12 *Research Center, Qingdao Key Laboratory of Nucleic Acid Rapid Detection, College*  
13 *of Biological Engineering, Qingdao University of Science and Technology, Qingdao,*  
14 *266042, P. R. China.*

15 <sup>c</sup> *Qingdao Navid Biotechnology Co., Ltd, Qingdao, 266114, P. R. China*

16

17

18

19 \* To whom correspondence should be addressed.

20 <sup>1</sup> These two authors contributed equally to this work

21 Tel (Fax): +86-532-85955399

22 E-mail: [sc169@163.com](mailto:sc169@163.com)



24 **Table S1. Sequences of nucleic acids used in this work**

| Name | Sequence (5'-3')                                    |
|------|-----------------------------------------------------|
| F3   | ATGCAAAGAAAATTGAAGTCGA                              |
| B3   | GCGTTGTCTTCGCTCCAAAT                                |
| FIP  | CGTTTACCATTTTTCCATCAGCATAGTTTGACAAAGGT<br>CAAAGAACT |
| BIP  | TCAAGGCTTGGCTAAAGTTGCTTATTTTCGCTTGTGCT<br>TCACTT    |
| LF   | TACGCTAAGCCACGTCCATA                                |
| LB   | CCTAACAATACACATGAACAAC                              |
| F    | AGCGATTGATGGTGATACGGT                               |
| R    | AGGATGCTTTGTTTCAGGTGT                               |

25 Notes: LAMP primer sequences were adopted from previously published studies<sup>1</sup>. PCR primers  
 26 were designed and optimized using NUPACK software (<http://www.nupack.org/>) and NCBI  
 27 Primer-BLAST (<https://www.ncbi.nlm.nih.gov/tools/primer-blast>).

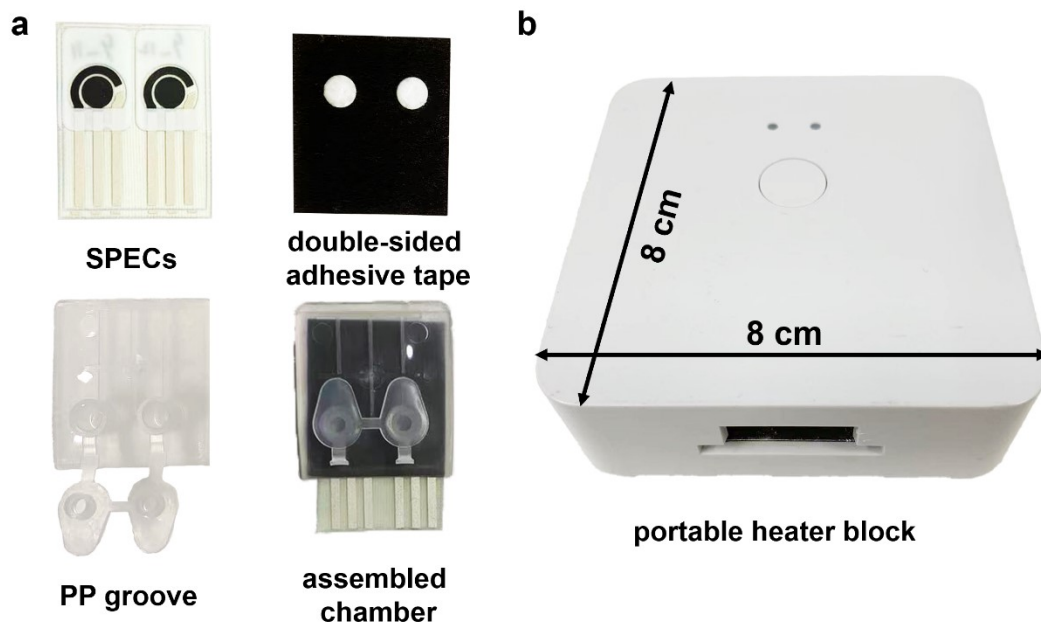

28  
 29 **Figure S1.** Assembly and configuration of the portable EC-LAMP system. (a) Fabrication of the  
 30 reaction chamber by integrating SPCEs, a PP groove, and double-sided adhesive tape. (b) Portable  
 31 heater block employed for isothermal incubation during in situ EC-LAMP.

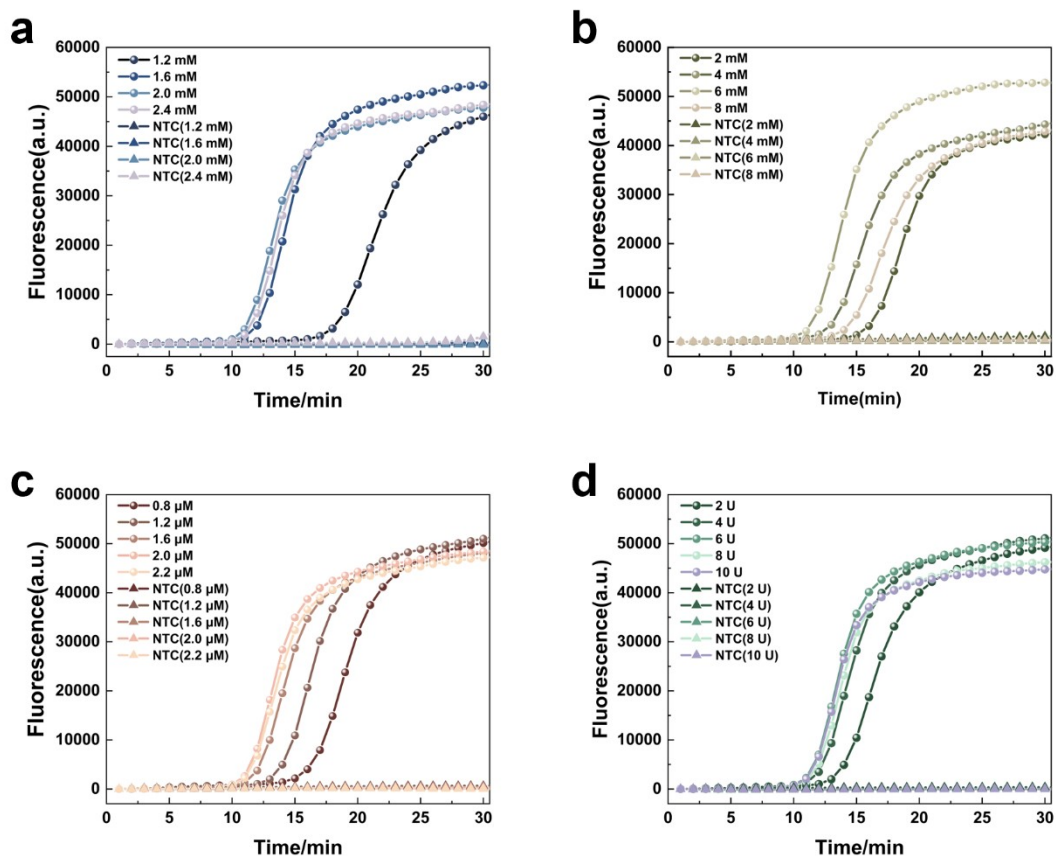

33

34 **Figure S2.** Optimization of the reaction conditions for LAMP. (a) different amounts of dNTPs. (b)  
 35 different amounts of  $MgSO_4$ . (c) different amounts of inner primers (FIP/BIP). (d) different  
 36 amounts of Bst DNA polymerase.

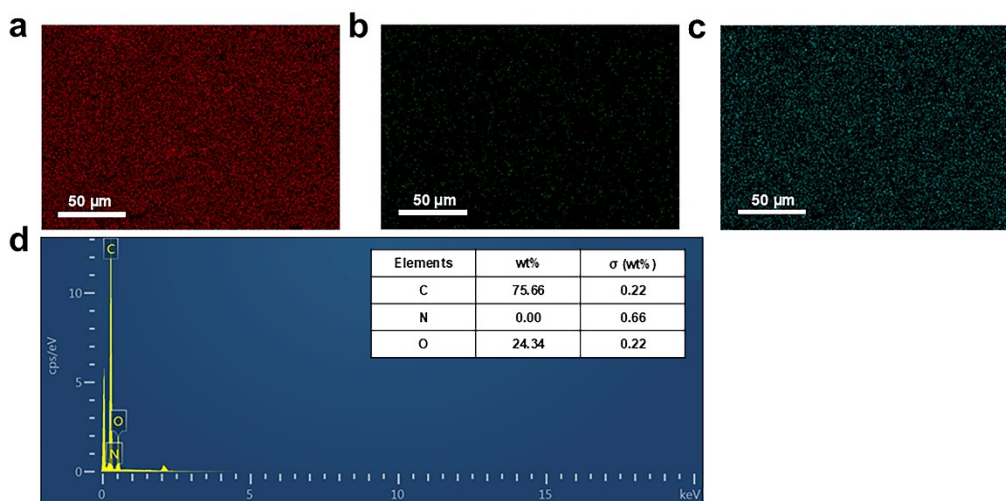

37

38 **Figure S3.** (a-c) EDS elemental mapping images of C, N, and O, respectively, of the bare  
 39 electrode. (d) EDS spectrum of the selected area, showing the characteristic peaks of C, N, and O.  
 40 The inset table lists the corresponding elemental weight percentages (wt%) with standard  
 41 deviations ( $\sigma$ ).

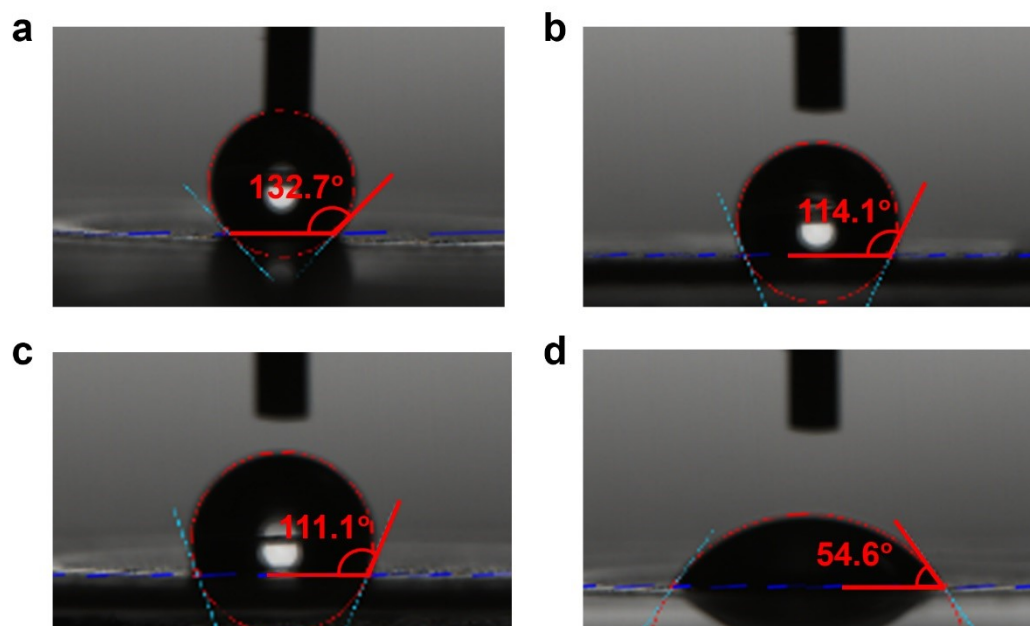

43

44 **Figure S4.** Water contact angle images of the electrode surfaces: (a) bare SPCE, (b) H<sub>2</sub>SO<sub>4</sub>-treated  
45 SPCE, (c) EDC/NHS-treated SPCE, and (d) PCBMA- SPCE.

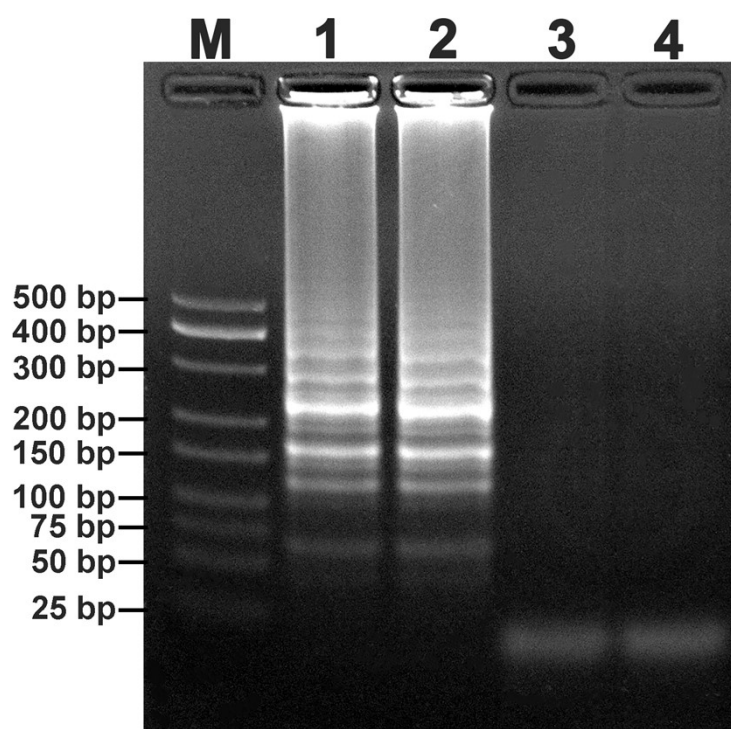

46

47 **Figure S5.** Agarose gel electrophoresis image of the LAMP products. Lane 1, Real-time  
48 fluorescence LAMP positive; Lane 2, In situ electrochemical LAMP positive; Lane 3, Real-time  
49 fluorescence LAMP NTC; Lane 4, In situ electrochemical LAMP NTC. M represents the DNA  
50 Marker (25–500 bp). The target concentration was 10<sup>6</sup> CFU/mL. NTC stands for no target control.

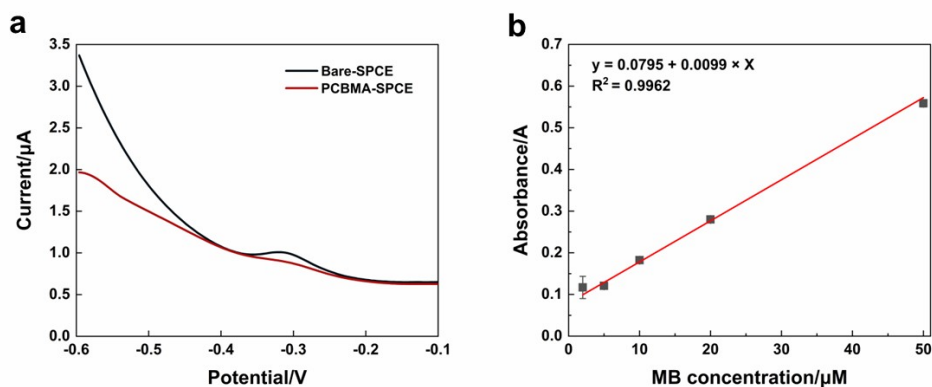

51

52 **Figure S6.** Quantitative evaluation of MB adsorption. (a) Electrochemical signals of residual MB  
 53 on bare and PCBMA-modified electrodes measured in PBS after removal of MB solution and  
 54 triple rinsing. (b) Calibration curve of MB absorbance versus concentration used for quantification.  
 55 Error bars represent standard deviations from three independent measurements.

56 To quantitatively evaluate the nonspecific adsorption of methylene blue (MB), the residual  
 57 MB concentration in the supernatant after incubation with the electrodes was determined using a  
 58 calibration curve (Figure S6b). Based on the Beer–Lambert law, the absorbance values were  
 59 converted to concentration using the linear relationship  $A = 0.0795 + 0.0099C$ . After 30 min  
 60 incubation with an initial MB concentration of 20 μM, the remaining concentration ( $C_e$ ) was  
 61 calculated to be 19.90 μM for the PCBMA-modified electrode and 19.46 μM for the bare  
 62 electrode. Accordingly, the adsorption amount ( $q = C_0 - C_e$ ) was estimated to be 0.10 μM and  
 63 0.54 μM for PCBMA and bare electrodes, respectively. These results indicate that the PCBMA-  
 64 modified surface significantly suppresses MB adsorption. The adsorption mitigation efficiency  
 65 was calculated to be approximately 81.5%, demonstrating the effective antifouling property of the  
 66 zwitterionic PCBMA coating. Although the concentration difference is relatively small, the trend  
 67 is consistent with electrochemical measurements.  
 68

## 69 Table S2. Comparison of representative electrochemical LAMP (EC-LAMP)

## 70 systems reported for nucleic acid detection.

| Signal rationale                       | Electrode / Interface                                | Antifouling strategy       | Time    | Sensitivity                          | Target                                 | References |
|----------------------------------------|------------------------------------------------------|----------------------------|---------|--------------------------------------|----------------------------------------|------------|
| Potentiometric pH change               | Hydrated iridium oxyhydroxide-modified SPCEs         | Not found                  | 30 min  | $\sim 1.0 \times 10^3$ CFU/mL        | <i>Vibrio parahaemolyticus</i>         | 2          |
| Oxidation of phenol red (pH-dependent) | thick-film carbon electrodes                         | Not found                  | 122 min | $\sim 2 \times 10^5$ copies/ $\mu$ L | <i>Streptococcus pneumoniae</i>        | 3          |
| pH change via cresol red               | 3D-printed electrode with pH-responsive readout      | UV-laser surface treatment | 31 min  | $\sim 11$ copies/ $\mu$ L            | Methicillin-resistant <i>S. aureus</i> | 4          |
| Phenol red                             | SPE graphene-gold-polyaniline (Gr/Au/PANI) electrode | Not found                  | 30 min  | 20 copies / $\mu$ L                  | <i>SARS-CoV-2</i>                      | 5          |
| pH change                              | polyaniline (Gr/Au/PANI) electrode                   | Not found                  | >30 min | 1 copy/ $\mu$ L                      | <i>Helicobacter pylori</i>             | 6          |
| pH change                              | polyaniline                                          | Not found                  | 30 min  | 1 copy/reaction                      | <i>Mycoplasma pneumoniae</i>           | 7          |
| Potentiometric pH change               | 3D printed electrode - modified iridium oxide layer  | Not found                  | >60 min | 100 copies/mL                        | lambda DNA                             | 8          |
| Mediator-                              | Carbon                                               | Covalent                   | 30 min  | $\sim 1 \times 10^3 / 4 \times 10^2$ | <i>Staphylococcus</i>                  | 9          |

|              |                |             |         |  |                         |                     |           |
|--------------|----------------|-------------|---------|--|-------------------------|---------------------|-----------|
| displacement | electrode +    | probe       |         |  | copies/reactio          | <i>us aureus/</i>   |           |
| MB labeled   | solid-phase    | attachment  |         |  | n                       | <i>Treponema</i>    |           |
| mediator     | universal      | reduces     |         |  |                         | <i>pallidum</i>     |           |
|              | probe          | nonspecific |         |  |                         |                     |           |
|              | Multiwalled    |             |         |  |                         |                     |           |
| Molybdophos  | carbon         |             |         |  |                         | <i>Nosema</i>       |           |
| phate        | nanotubes -    | Not found   | 70 min  |  | ~17 fg/μL               | <i>bombycis</i>     | 10        |
| precipitate  | modified       |             |         |  |                         |                     |           |
|              | GCE            |             |         |  |                         |                     |           |
| molybdophos  |                |             |         |  | ~1.0 × 10 <sup>3</sup>  |                     |           |
| phate        | SPCEs          | Not found   | 45 min  |  | CFU/mL 5.29             | SARS-CoV-2          | 11        |
| precipitate  |                |             |         |  | copies/μL               |                     |           |
| Digoxigenin- | Carbon         |             |         |  |                         | PCA3                |           |
| dUTP         | electrode      | Not found   | 110 min |  | Not found               | lncRNA              | 12        |
|              | chips          |             |         |  |                         |                     |           |
|              | a disposable   |             |         |  | 3 × 10 <sup>2</sup>     |                     |           |
| Hoechst      | electrochemic  | Not found   | 60 min  |  | copies/reactio          | GMO                 | 13        |
| 33258        | al printed     |             |         |  | n                       |                     |           |
|              | (DEP) chip     |             |         |  |                         |                     |           |
|              |                |             |         |  |                         | plasmid DNA         |           |
| RuHex        | gold           | Not found   | 60 min  |  | 10 <sup>1</sup> copies  | (parvovirus         | 14        |
|              | electrode      |             |         |  |                         | VP2 gene)           |           |
| Malachite    | Thick-film     |             |         |  | ~22                     | SARS-CoV-2          | 15        |
| green        | screen printed | Not found   | 30 min  |  | copies/μL               |                     |           |
|              | electrodes     |             |         |  |                         |                     |           |
| Methylene    | AuNPs/SH-      |             |         |  | ~17.7                   | <i>Salmonella</i>   |           |
| blue         | DNA probe/     | Pyrene      | 40 min  |  | CFU/mL                  | <i>enteritidis</i>  | 16        |
| Methylene    |                |             |         |  | ~2.5 × 10 <sup>-6</sup> | SARS-CoV-2          | 17        |
| blue         | SPCEs          | Not found   | 30 min  |  | ng/μL                   |                     |           |
| Methylene    | PCBMA-         |             |         |  |                         | <i>Staphylococc</i> |           |
| blue         | modified       | PCBMA       | 30 min  |  | 12 CFU/mL               | <i>us aureus</i>    | This work |
|              | SPCEs          |             |         |  |                         |                     |           |

73 **Table S3. Determination of *S. aureus* in milk samples with the proposed**  
 74 **biosensor.**

| Spiked concentration (CFU mL <sup>-1</sup> ) | Found concentration (CFU mL <sup>-1</sup> ) # | Recovery (%) | RSD (%) |
|----------------------------------------------|-----------------------------------------------|--------------|---------|
| 1.0 × 10 <sup>2</sup>                        | 9.04 × 10 <sup>1</sup>                        | 90.4         | 0.66    |
| 1.0 × 10 <sup>4</sup>                        | 9.18 × 10 <sup>3</sup>                        | 91.8         | 1.44    |
| 1.0 × 10 <sup>6</sup>                        | 9.69 × 10 <sup>5</sup>                        | 96.9         | 2.13    |

75 #Average of three measurements

76

77

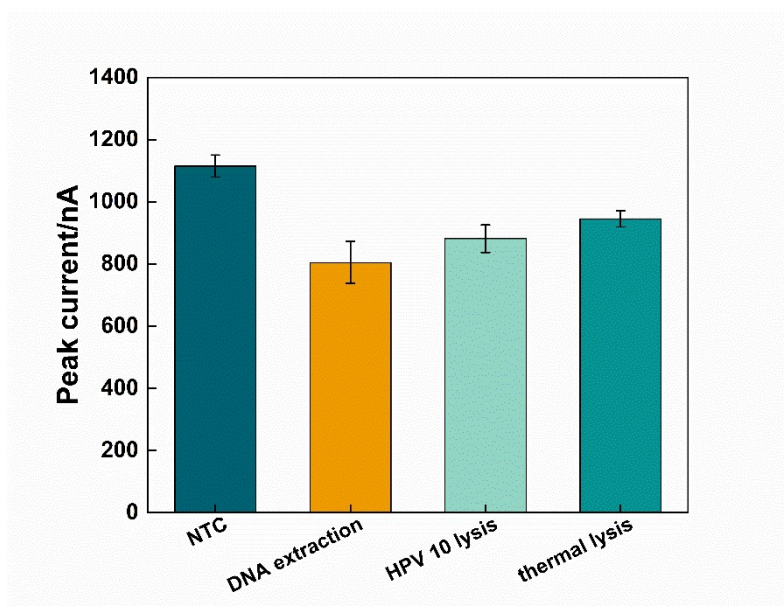

78

79 **Figure S7.** Electrochemical responses obtained from spiked milk samples (10<sup>3</sup> CFU mL<sup>-1</sup>)  
 80 subjected to different pretreatment methods. NTC: no-template control; DNA extraction:  
 81 commercial kit-based purification; nucleic acid releaser (95°C, 5 min); thermal lysis: direct  
 82 heating (95°C, 5 min).

83

84

85

## References

- 86 1 Y. Wang, H. Li, Y. Wang, L. Zhang, J. Xu and C. Ye, *Front. Microbiol.*, 2017, **8**, 192.
- 87 2 L. Tian, Y. Li, H. Wang, X. Li, Q. Gao, Y. Liu, Y. Liu, Q. Wang, C. Ma and C. Shi, *Anal. Biochem.*,
- 88 2024, **693**, 8.
- 89 3 A. Gonzalez-Lopez, M.D. Cima-Cabal, P. Rioboo-Legaspi, E. Costa-Rama, M.D.M. Garcia-Suarez
- 90 and M.T. Fernandez-Abedul, *Anal. Chem.*, 2022, **94**, 13061-13067.
- 91 4 L.F. de Lima, P.F.N. Estrela, L.C. Faustino, J. Souza, E.T.S. Geroncio, L.F. de Lima, E.F.L.C.
- 92 Bailao, W.R. de Araujo, T.R.L.C. Paixao and G.R.M. Duarte, *Anal. Chim. Acta*, 2025, **1372**, 9.
- 93 5 P. Rioboó-Legaspi, E. Costa-Rama and M.T. Fernández-Abedul, *Lab Chip*, 2024, **24**, 4085-4095.
- 94 6 R.R. Kumar, C.Y. Wang, A.M. Bharti, W.C. Hu, Y.C. Zhang, L.S. Yu, P. Tungtrakarnkul, K.C.W.
- 95 Wu and C.H. Chuang, *Anal. Chem.*, 2025.
- 96 7 H. Wang, Y. Li, L. Tian, X. Li, Q. Gao, Y. Liu, C. Ma, Q. Wang and C. Shi, *Analytical Methods :*
- 97 *Advancing Methods and Applications*, 2024, **16**, 3020-3029.
- 98 8 Z. Xu, K. Yin, X. Ding, Z. Li, X. Sun, B. Li, R.V. Lalla, R. Gross and C. Liu, *Biosens. Bioelectron.*,
- 99 2021, **186**, 113306.
- 100 9 M. Trotter, A. Schreiber, D. Kleinknecht, Z. Bagherian, F. von Stetten and N. Borst, *ACS Sens.*,
- 101 2024, **10**, 1788-1796.
- 102 10 S. Xie, Y. Yuan, Y. Chai and R. Yuan, *Anal. Chem.*, 2015, **87**, 10268-10274.
- 103 11 K. Borah Slater, M. Ahmad, A. Poirier, A. Stott, B.S. Siedler, M. Brownsword, J. Mehat, J.
- 104 Urbaniec, N. Locker, Y. Zhao, R. La Ragione, S.R.P. Silva and J. McFadden, *Iscience*, 2023, **26**,
- 105 107570.
- 106 12 L. Moranova, M. Stanik, R. Hrstka, S. Campuzano and M. Bartosik, *Talanta*, 2022, **238**, 123064.
- 107 13 M.U. Ahmed, M. Saito, M.M. Hossain, S.R. Rao, S. Furui, A. Hino, Y. Takamura, M. Takagi and E.
- 108 Tamiya, *The Analyst*, 2009, **134**, 966-972.
- 109 14 K. Hashimoto, M. Inada and K. Ito, *Anal. Biochem.*, 2017, **539**, 113-117.
- 110 15 P. Rioboó-Legaspi, N. Rabanal-Rubio, E. Costa-Rama, M.D. Cima-Cabal, M.D.M. García-Suárez
- 111 and M.T. Fernández-Abedul, *Microchem J.*, 2024, **198**, 110172.
- 112 16 X. Li, Y. Fan, H. Gong, H. Wang, Y. Ji, L. Xu, C. Ma and C. Shi, *Mikrochim. Acta*, 2024, **191**, 11.
- 113 17 R.G. Ramírez-Chavarría, E. Castillo-Villanueva, B.E. Alvarez-Serna, J. Carrillo-Reyes, R.M.
- 114 Ramírez-Zamora, G. Buitrón and L. Alvarez-Icaza, *J. Environ. Chem. Eng.*, 2022, **10**, 107488.
- 115
